1  
2 CaveCrawler: An interactive analysis suite for cavefish bioinformatics

3  
4 Annabel Perry<sup>1</sup>, Suzanne E. McGaugh<sup>2</sup>, Alex C. Keene<sup>1#</sup>, and Heath Blackmon<sup>1#</sup>

5  
6 1. Department of Biology, Texas A&M University, College Station, TX

7 2. Ecology, Evolution, and Behavior, University of Minnesota, Saint Paul, Minnesota,  
8 United States of America.

9  
10 # address correspondence to [hblackmon@bio.tamu.edu](mailto:hblackmon@bio.tamu.edu) and [akeene@bio.tamu.edu](mailto:akeene@bio.tamu.edu)

11  
12  
13  
14 **Abstract**

15 The growing use of genomics data in diverse animal models provides the basis for  
16 identifying genomic and transcriptional differences across species and contexts.  
17 Databases containing genomic and functional data have played critical roles in the  
18 development of numerous genetic models but are lacking for most emerging models of  
19 evolution. There is a rapidly expanding use of genomic, transcriptional, and functional  
20 genetic approaches to study diverse traits of the Mexican tetra, *Astyanax mexicanus*.  
21 This species exists as two morphs, eyed surface populations and at least 30 blind cave  
22 populations, providing a system to study convergent evolution. We have generated a  
23 web-based analysis suite that integrates datasets from different studies to identify how  
24 gene transcription and genetic markers of selection differ between populations and across  
25 experimental contexts. Results can be processed with other analysis platforms including  
26 Gene Ontology (GO) to enable biological inference from cross-study patterns and identify  
27 future avenues of research. Furthermore, the framework that we have built *A. mexicanus*  
28 can readily applied to other emerging model systems.

29

30

## 31 Introduction

32 The reduced cost and increased efficiency of sequencing has led to enormous growth  
33 in the application of sequencing approaches to study diverse biological processes. In  
34 previous decades, these approaches were predominantly performed on a small number  
35 of genetically amendable model organisms including *Caenorhabditis elegans*, *Drosophila*  
36 *melanogaster*, zebrafish, and mouse. Model-organism-specific databases have been  
37 generated for each of these model systems, providing critical resources that decrease  
38 access barriers to genomic and phenotypic data (1-3). Recently, there has been  
39 increased application of genomic and molecular approaches to non-standard model  
40 systems, as these model systems may enable comparative evolutionary studies not  
41 possible in traditional systems (4). However, a lack of databases and analytic tools for  
42 many of these emerging model organisms impedes analysis of genomic data collected  
43 across different studies.

44  
45 The Mexican tetra, *Astyanax mexicanus* is an emerging model system to study the  
46 convergent evolution of diverse biological traits. These fish are comprised of a single  
47 population of river dwelling surface fish and at least 30 cavefish populations of the same  
48 species (5). *Astyanax mexicanus* cavefish populations have independently evolved  
49 numerous morphological, behavioral, and physiological differences from their surface  
50 conspecifics (6,7). These fish can be efficiently reared in laboratories, allowing for the  
51 application of transgenic and gene-editing approaches (8). There is a rapidly growing  
52 focus on genomic data in these systems that compare cave and surface populations.  
53 Current genomic data includes fully assembled genomes for surface and cave  
54 populations, population genetic resequencing, and transcriptomic data across different  
55 contexts (9,10). The development of a database that compiles the growing number of  
56 genomics data across different contexts would provide a valuable resource for accessing  
57 and analyzing this information.

58  
59 The Shiny package in R offers a method to produce powerful community web  
60 resources that can go far beyond traditional repositories of data (11). Shiny databases  
61 enable researchers to incorporate the statistical analysis and data visualization

62 capabilities of the R programming language into a reactive database that also functions  
63 as a community data repository. The combination of these tools allows users to sift  
64 through vast amounts of data, enabling novel discoveries (12). The generation of a Shiny  
65 database for comparative models of evolution could combine data across populations  
66 and studies. The flexibility of these systems and intrinsic analysis capabilities allows for  
67 direct comparisons of genetic data from disparate sources. Here, we generated a Shiny  
68 database, CaveCrawler, which combines population genetics and transcriptomic data  
69 from multiple Mexican tetra populations and leverages Gene Ontology (GO) term  
70 information to enable unique biological inferences from cross-study patterns. We  
71 demonstrate that the analysis features of this program can identify genes that are  
72 implicated in evolutionary processes across populations of *A. mexicanus*, using different  
73 methodologies, and in different studies.

74

## 75 **Methods**

76 The CaveCrawler database acts as a repository for transcription, Gene Ontology (GO),  
77 population genetics, and annotated genome data acquired from different studies in *A.*  
78 *mexicanus*, including those using reference genomes for surface and Pachón cavefish  
79 (9,13). With a highly accessible web interface, CaveCrawler enables researchers to  
80 search for data on genes-of-interest, find genes whose transcriptional levels match  
81 defined criteria, find genes which fit desired population genetics parameters, and also  
82 identify genes associated with cellular components, molecular functions, and biological  
83 processes.

84

## 85 ***CaveCrawler* modules**

86 The CaveCrawler framework utilizes a bifurcated design with an underlying data  
87 repository and a collection of user interface modules (Figure 1). The databases currently  
88 offers five user modules: Home, Gene Search, Transcription, Population Genetics, and  
89 GO Term Info. Each of these modules is designed to draw on different elements of the  
90 underlying data repository. This bifurcated design facilitates simple updates to the  
91 repository which then are immediately populated into changes in the functionality and  
92 results produced by the modules that draw on the updated repositories. Similarly, new

93 modules can be added at any time to take advantage of new types of analyses users  
94 desire or new data types included in the repository. The home module houses general  
95 information about *A. mexicanus* and about CaveCrawler's functionality, as well brief  
96 instructions for contributing data.

97

98 The Gene Search module enables the user to search for data associated with genes-  
99 of-interest and also to identify genes associated with GO terms-of-interest. In this module,  
100 the user inputs a single gene stable ID, a single GO term, or a comma-separated list of  
101 genes. The module outputs a downloadable table describing all genes associated with  
102 the inputs and the positional, transcription, and population genetics data associated with  
103 each of the genes. The output also indicates whether a statistic or piece of transcriptional  
104 data is not present for each gene-of-interest. Therefore, this module concatenates data  
105 from disparate sources into a single analysis output, enabling the user to efficiently search  
106 for existing data and identify experiments which have yet to be conducted on their genes-  
107 of-interest.

108

109 The Transcription module enables the user to identify genes which differ in  
110 transcription level between groups. Here, the user first inputs the groups they would like  
111 to compare. The user may either compare an experimental group to a control group or  
112 compare one morph to another morph. The user then specifies whether they would like  
113 to see genes which are up or downregulated in the first group compared to the second  
114 and the percent change in transcription level between groups. The module then produces  
115 a downloadable output table of genes fitting the specified transcription patterns.

116

117 The Population Genetics module enables the user to access population genomics  
118 statistics, such as  $\pi$ , Tajima's D,  $d_{XY}$ , and  $F_{ST}$ . This module has two options for accessing  
119 population genomics data. In the first option, the user provides GO terms and the module  
120 outputs and visualizes the statistical values of all genes associated with those GO terms.  
121 The second approach enables the user to search for transcriptional or genomic values  
122 associated with defined across different analyses.

123

124 In the GO term search function of the Population Genetics module, the user inputs GO  
125 information, statistics-of-interest, and populations-of-interest. For the GO information, the  
126 user can input either a single GO ID, a comma-separated list of GO IDs, or a phrase  
127 associated with the target GO term. The module outputs a downloadable table describing  
128 all values of the population-specific statistics-of-interest for the genes associated with the  
129 indicated GO term(s). If any of the statistics-of-interest require pairwise comparisons  
130 between populations, the module will output pairwise statistics for each possible pairing  
131 of input populations. On this submodule, the user may also input a statistic and a scaffold  
132 and CaveCrawler will plot the statistical values of each GO-term-associated gene which  
133 falls on that scaffold. The GO term function of the Population Genetics module thus  
134 enables the user to access and visualize population genomics statistics for a GO term of  
135 interest.

136

137 The outlier function of the Population Genetics module consists of two approaches for  
138 pulling outlier genes from combined datasets. One approach enables the user to identify  
139 a specified number of genes which have the most extreme values for an indicated  
140 statistic, while the other approach enables the user to identify all genes whose statistic  
141 value falls above or below a specified threshold value. In the gene number approach, the  
142 user must specify the number of genes and must specify whether they would like to see  
143 the top or bottom quantile. CaveCrawler then outputs a table describing the specified  
144 number of genes with the most extreme values for the statistic-of-interest. In the statistical  
145 threshold approach, the user specifies a threshold statistical value and specifies whether  
146 they would like to see genes above or below this value. CaveCrawler outputs both a table  
147 and a distribution plot describing the genes which fall above or below this threshold.

148

149 Both outlier approaches require the user input a statistic-of-interest and population(s)-  
150 of-interest. If the statistic-of-interest is a one-population statistic, such as  $\pi$  or Tajima's D,  
151 both approaches will report outlier statistical values for all input populations. If the input  
152 statistic is a pairwise statistic, such as  $F_{ST}$  or  $d_{XY}$ , both approaches will report outlier  
153 statistical values for all possible pairs of populations-of-interest. If a statistic value has yet  
154 to be collected for a population or population pair, CaveCrawler will output a warning

155 about that statistic. Thus, the outlier function of the Population Genetics module enables  
156 users to not only identify outliers for a statistic-of-interest but also to identify populations  
157 for which a statistic-of-interest has yet to be collected.

158

159 The GO Term Info module enables users to access descriptions of GO IDs. This  
160 function helps users identify GO IDs they should search for in the Population Genetics  
161 module and helps them make sense of transcription and outlier queries. On this module,  
162 the user may input a single GO ID, comma-separated list of GO IDs, or a phrase-of-  
163 interest, such as “sleep”. CaveCrawler searches data from the official Gene Ontology  
164 databank, outputting descriptions of all input GO IDs or GO IDs relevant to the input  
165 phrase. In addition, CaveCrawler reports all GO IDs which occur hierarchically beneath  
166 these IDs. The GO Term Info module thus enables researchers to investigate the broader  
167 biological impact of transcription and diversity data relevant to their genes-of-interest.

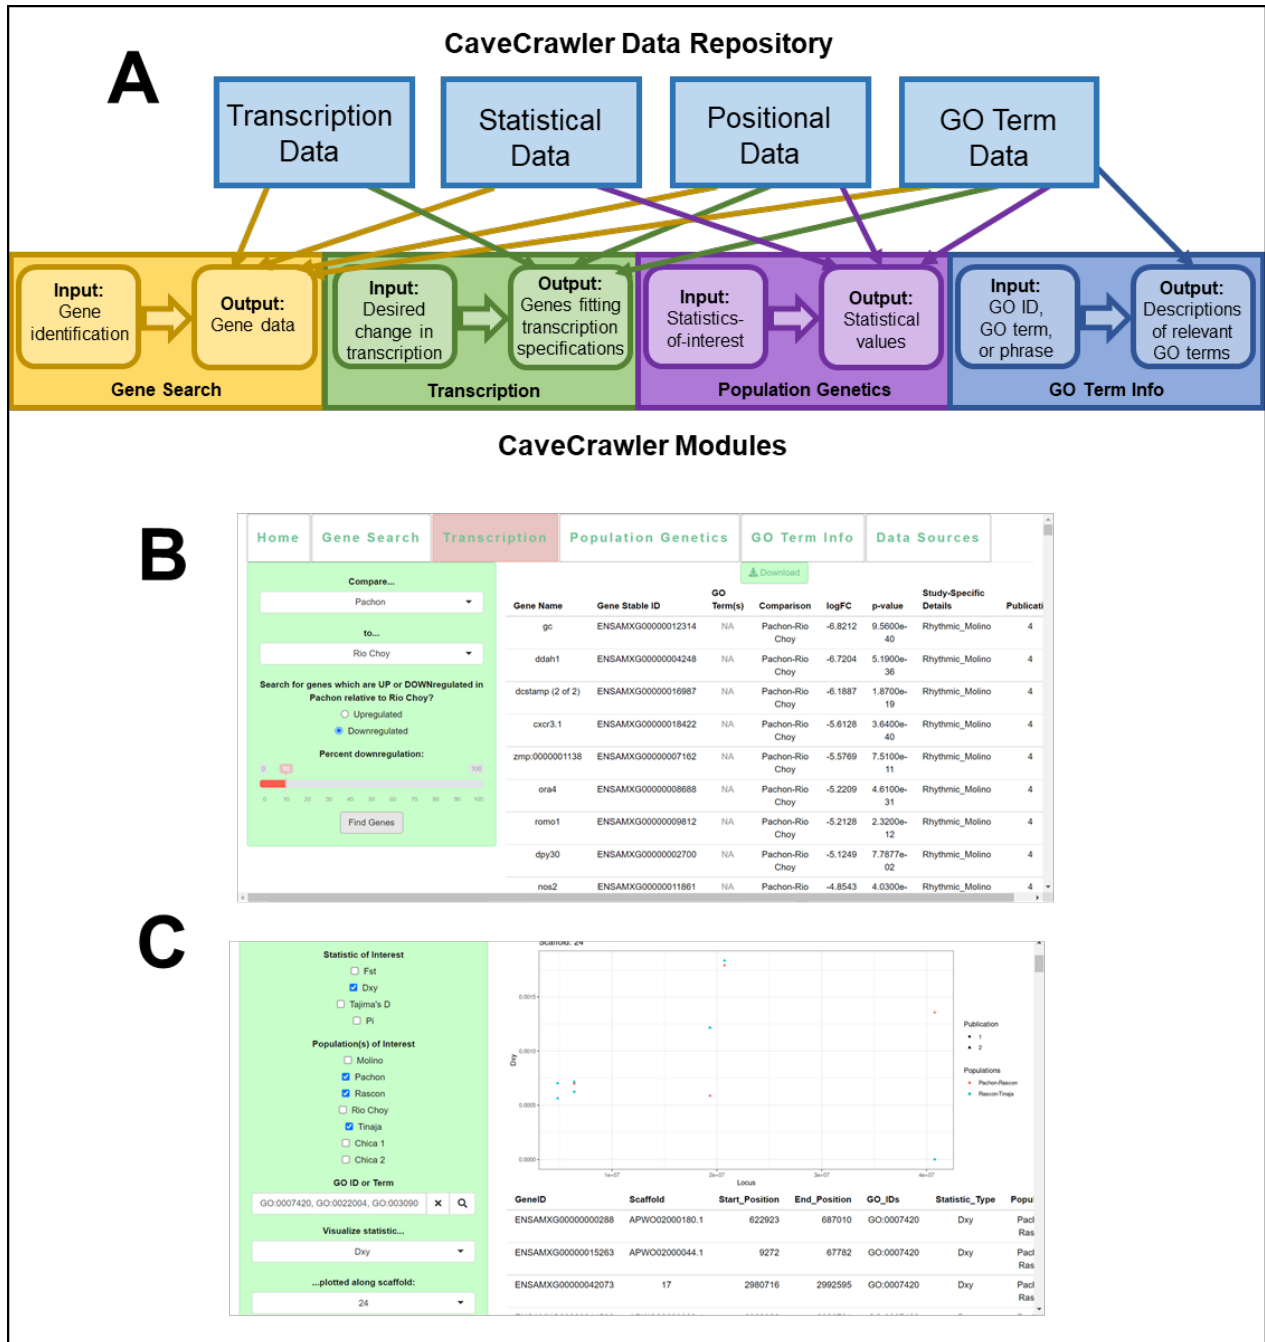

**Figure 1. Design and web interface for CaveCrawler**

A) The repository and module framework for the CaveCrawler model organism genomics database. Lines show the connections between different types of data stored in the repository and the user modules that draw on each data type. B) Example of the Transcription module with the results of searching for top 10% of genes that are downregulated in Pachón relative to Río Choy surface fish C) Example of the Population Genetics module with the results of searching for the Pachón-Rascon surface fish and Rascon-Tinaja  $d_{XY}$  values of genes associated with brain development GO IDs and visualizing these values on Scaffold 24



169 ***The data repository***

170 CaveCrawler pools data from multiple publications and authors can request that their  
171 own data be integrated into CaveCrawler's repository. As of publication, CaveCrawler's  
172 data bank includes transcriptional datasets (14,15), population genetics datasets (10,15),  
173 GO data from UniProt and the Gene Ontology Consortium (16-18), and genome  
174 architecture data from Ensembl Genome Browser, release 104 (19).

175

176 CaveCrawler's Transcription and Gene Search modules currently draw upon datasets  
177 that describe genes whose transcription levels changed significantly in response to sleep  
178 deprivation in *A. mexicanus* (20). This dataset describes the log fold-change (logFC) and  
179 p-values for each of these genes in each *A. mexicanus* morph where the change in  
180 transcription was significant compared to controls of the same morph (20). As described  
181 in the Transcription module section of this paper, CaveCrawler can also access  
182 transcription data for genes whose transcription is significantly different between morphs  
183 (14). The Transcription module has enough flexibility that new transcriptional data can be  
184 integrated. Thus, CaveCrawler could be used to analyze transcriptional changes in  
185 response to any experimental condition and between any two morphs of *A. mexicanus*.

186

187 CaveCrawler's Population Genetics and Gene Search modules currently integrate  
188 data from two studies describing signatures of selection in *A. mexicanus* (10,15). One of  
189 these studies calculated  $\pi$  and Tajima's D values for the Pachon, Tinaja, Molino, Río  
190 Choy, and Rascon populations, as well as  $F_{ST}$  and  $d_{XY}$  values for each population pair  
191 (10). The other study describes  $d_{XY}$  values of all genes in two populations of the Chica  
192 morph, Pachon and Rascon, and Tinaja and Rascon (15). As with the Transcription  
193 module, the Population and Gene Search modules have enough flexibility that new data  
194 can be integrated.

195

196 The Gene Search, Transcription, and Population Genetics modules currently draw  
197 upon positional data obtained from Ensembl (19). The genome assembly used in the  
198 current version is *A. mexicanus* 2.0, the most up-to-date genome assembly for this



199 species (9). All of CaveCrawler's modules utilize GO term information from UniProt and  
200 from the Gene Ontology Consortium (16-18).

201

202 Though CaveCrawler already integrates data from numerous disparate sources,  
203 enabling powerful cross-study comparisons of genetic data, CaveCrawler's data  
204 repository is not static. The CaveCrawler website includes instructions for data  
205 submission and the power and insights possible with this resource will grow as the  
206 repository of data on which draws grows. CaveCrawler's data repository will be updated  
207 annually in July.

208

## 209 **Results**

210 The CaveCrawler analysis suite consists of multiple tools for comparing datasets that  
211 allow for identification of genetic differences between populations of *A. mexicanus*. These  
212 tools have a wide range of applications, including rapid candidate gene identification and  
213 inference of population-level variation. Here, we present an example of how CaveCrawler  
214 can be used to answer biological questions.

215

### 216 ***Rapid Identification of Candidate Genes for Empirical Studies***

217 Since CaveCrawler enables simultaneous cross-analysis of multiple studies,  
218 researchers can use CaveCrawler to find genes which are outliers for both transcription  
219 and population genetics statistics in a matter of minutes. These genes can then be  
220 analyzed in downstream studies, such as GO term analyses, to make biological  
221 inferences. Here, we identified genes which are transcriptionally dysregulated between  
222 cave and Río Choy morphs, then performed a GO term analysis to determine the  
223 biological function and cellular components with which these genes are associated.  
224 These genes could be used as candidates for future empirical studies, such as  
225 knockdown or knockout studies.

226

227 To examine genes that are both transcriptionally upregulated and harbor markers of  
228 selection, we first used CaveCrawler's Population Genetics module to identify the  $F_{ST}$   
229 values of all genes whose  $F_{ST}$  values were published in a recent population inference

230 paper in the Mexican tetra (see 10). Then, we used the ‘Gene Search’ module to identify  
231 the transcription data for each of the 1140 genes identified by the Population Genetics  
232 module (see Supplemental Table 1). By using the Gene Search module, we found that  
233 previous studies had measured the between-morph logFC values for 267 of the 1140  
234 genes for which we had  $F_{ST}$  values. Pairwise  $F_{ST}$  measures how dissimilar a DNA  
235 sequence is between two groups relative to diversity within the groups, and logFC is the  
236 log fold change in mRNA transcription between two groups (14,21). Of the genes for  
237 which both  $F_{ST}$  and logFC had been calculated by previous studies, there were 72 for  
238 which  $F_{ST}$  outlier status had been determined by a previous study (10). Gene names,  
239 logFC, transcription p-values, and  $F_{ST}$  values for all 72 genes are available in the  
240 supplemental materials.

241

242 For each cave- Río Choy surface comparison, we then identified the genes which were  
243 both significantly differentially expressed for circadian regulation (logFC p-value < 0.05)  
244 between Río Choy and the corresponding cave population and were identified by a  
245 previous study to be  $F_{ST}$  outliers for the same population pairing (10). These genes, which  
246 were both transcriptional and  $F_{ST}$  outliers, will henceforth be referred to as double outliers.  
247 We found one gene which was a double outlier in all three cave-Río Choy pairings (Table  
248 1; Figure 2), one which was a double outlier for both Pachón-Río Choy and for Tinaja-Río  
249 Choy (Table 1; Figure 2A and 2C), one which was a double outlier for Molino-Río Choy  
250 only (Table 1; Figure 2B), one which was a double outlier for Tinaja-Río Choy only (Table  
251 1; Figure 2C).

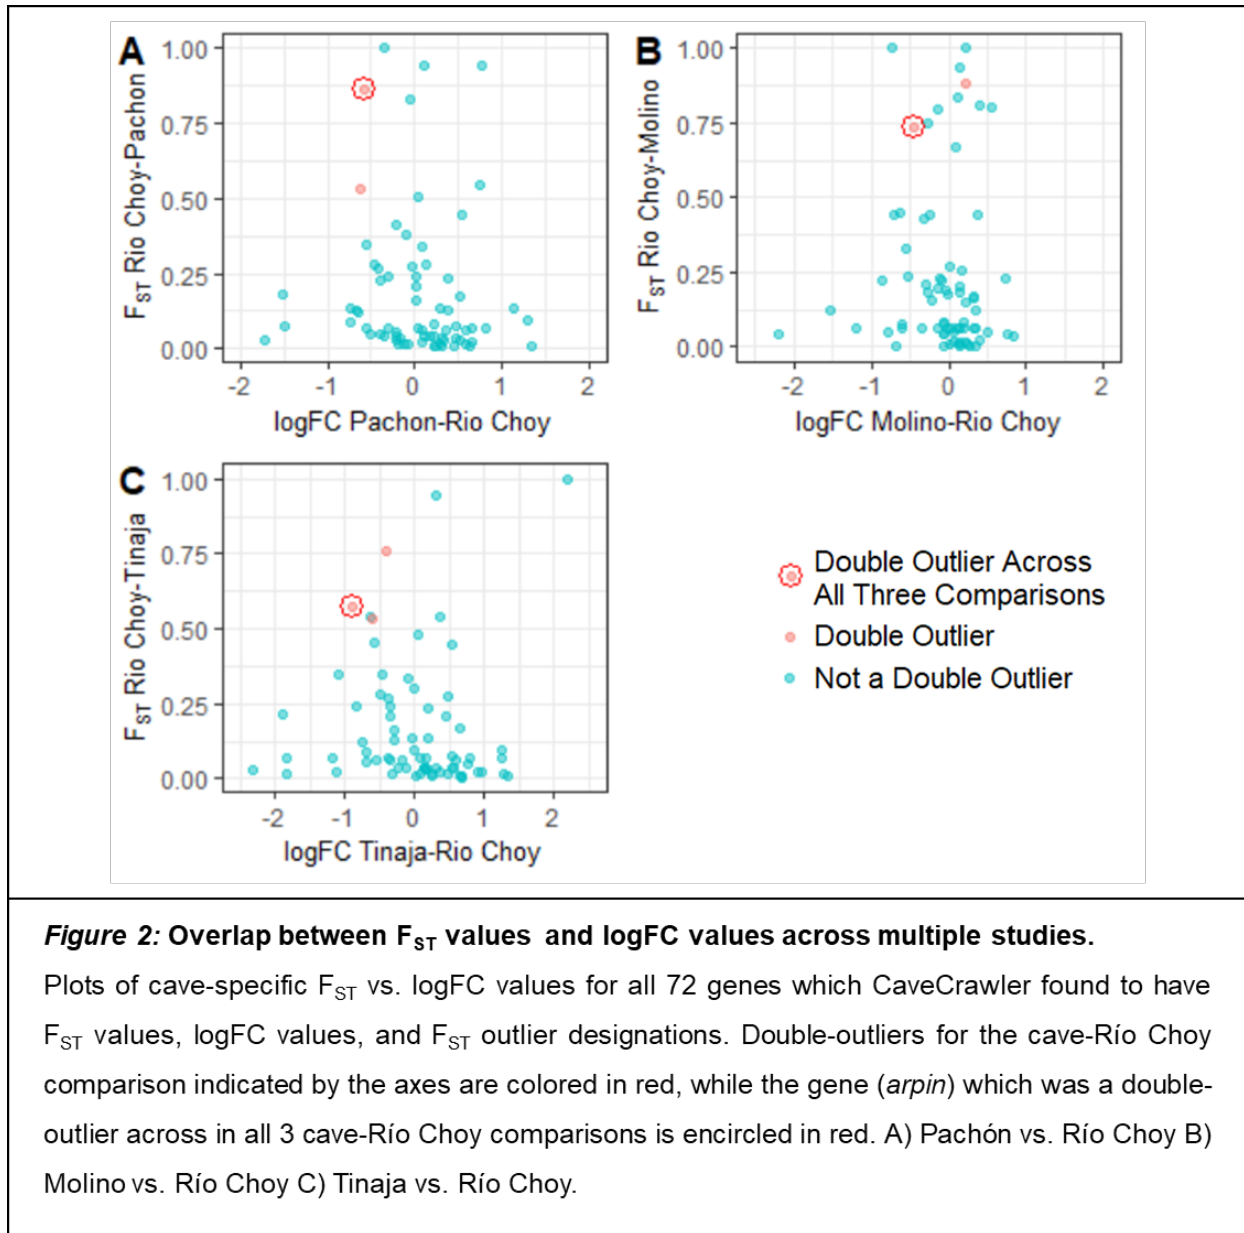

252

253

254

255

256

257

258

259

260

We performed a GO term analysis on *arpin* to identify any biological process, molecular function, or cellular component associated with this double outlier. We found *arpin* to be associated with the biological process GO ID GO:0051126 and the cellular component GO IDs GO:0016021 and GO:0030027, which correspond to “negative regulation of actin nucleation”, “integral component of membrane”, and “lamellipodium”, respectively. To calculate the likelihood of sampling an *A. mexicanus* gene associated with GO:0051126 by chance, we performed a Monte Carlo simulation for 1000000 iterations and calculate an empirical p-value of 2.8e-05. We performed another Monte Carlo to find the

261 likelihood of sampling GO:0016021 and GO:0030027 by chance, obtaining an empirical  
262 p-value of 4.4e-05. Thus, we used CaveCrawler to rapidly discover that genes that harbor  
263 markers of selection and are transcriptionally in cave populations across the circadian  
264 cycle.

265 As shown by this example, the CaveCrawler analysis suite can be used for a variety  
266 of investigations in the Mexican tetra. CaveCrawler can in minutes combine statistics from  
267 multiple studies and leverage GO terms to make novel inferences about evolutionary  
268 forces acting within a population.

269

## 270 **Discussion**

271 Here, we describe a modular analysis suite for *A. mexicanus*. We have included a set  
272 of the genomics and transcriptional data that has been previously published. In addition  
273 to these studies, transcriptional analysis across developmental timepoints, as well as  
274 single cell analysis of hypothalamus has been collected. These data sets, and others  
275 collected in the future can be added to this analysis suite. These data, in combination with  
276 assembled genomes for surface fish and Pachón cavefish provide a platform for gene  
277 discovery in this system. In addition, the modularity of this system allows it to be readily  
278 adapted for new data types or genomic analyses. We then demonstrated that this analysis  
279 suite can be used to combine data from disparate sources to discover novel patterns in  
280 the Mexican tetra genome.

281

282 As proof of principle, we performed an analysis for genes that contained markers of  
283 selection and transcriptional dysregulation across the circadian cycle. This analysis  
284 identified four genes that were significantly different. These genes represent strong  
285 candidate for functional regulators of evolved differences in circadian behavior that have  
286 been widely studied in *A. mexicanus* and other species of cavefish (14,22-25). The gene  
287 *arpin*, a negative regulator of *actin* is of particular interest because it is identified as  
288 harboring markers of selection and transcriptional dysregulation across all three cavefish  
289 populations. Actin dynamics have been implicated as targets of circadian regulation for a  
290 number of processes including wound healing, immune function and neural plasticity (26-  
291 28). Therefore, it is possible that multiple populations of cavefish have converged on

292 changes in actin regulation that account for loss of behavioral and transcriptional rhythms  
293 (14,24).

294

295 Shiny has been widely applied to develop a range of public databases that offer  
296 interactive data visualization and access (12,29,30). However, to our knowledge, this is  
297 the first use of Shiny to create a public genomic database and analysis tool for any model  
298 organisms. Traditionally these resources which are key to supporting model organism  
299 communities have come with considerable cost in the form of computer programmers and  
300 hosting services (31,32). Perhaps one of the most valuable contributions that  
301 CaveCrawler can make is as a flexible framework that can be adopted by any model  
302 organism community. We have made the underlying code for this project publicly  
303 available under the GPL license. All source code and example datasets are available in  
304 the GitHub repository: <https://github.com/AnnabelPerry/AstyanaxShinyApp>.

305

306 In *A. mexicanus*, like many other models of evolution, studies identifying quantitative  
307 trait loci (QTL) have provided a basis for a growing genetic toolkit in *A. mexicanus* can be  
308 used for functional genomics experiments guided CaveCrawler (7,33). For example,  
309 transgenesis, CRISPR-based transgenesis, and morpholinos have all been applied for  
310 functional validation of gene function (34-37). In addition, CRISPR-based screening  
311 approaches have been developed in zebrafish that allow for high throughput functional  
312 assessment of developmental and behavioral traits. This analysis suite will provide  
313 methodology for identifying genes for functional analysis.

| Gene Name              | Comparison          | Double<br>Outlier | $F_{ST}$ | logFC    | p-value for<br>logFC |
|------------------------|---------------------|-------------------|----------|----------|----------------------|
| <b>si:dkeyp-84f3.5</b> | Pachón vs. Río Choy | No                | 0.277988 | 0.139042 | 0.055824             |
|                        | Molino vs. Río Choy | Yes               | 0.882812 | 0.225267 | 0.003513             |
|                        | Tinaja vs. Río Choy | No                | 0.300349 | -0.01207 | 0.8625               |
| <b>socs6b</b>          | Pachón vs. Río Choy | No                | 0.826635 | -0.04327 | 0.83292              |
|                        | Molino vs. Río Choy | No                | 0.836271 | 0.107438 | 0.54766              |
|                        | Tinaja vs. Río Choy | Yes               | 0.756493 | -0.40817 | 0.01563              |
| <b>cyp26a1</b>         | Pachón vs. Río Choy | Yes               | 0.53226  | -0.61497 | 0.007395             |
|                        | Molino vs. Río Choy | No                | 0.792368 | -0.14028 | 0.55483              |
|                        | Tinaja vs. Río Choy | Yes               | 0.536471 | -0.59503 | 0.009671             |
| <b>arpin</b>           | Pachón vs. Río Choy | Yes               | 0.861159 | -0.58471 | 0.000358             |
|                        | Molino vs. Río Choy | Yes               | 0.734267 | -0.46234 | 0.000122             |
|                        | Tinaja vs. Río Choy | Yes               | 0.576169 | -0.88163 | 1.33E-10             |

**Table 1: Genes identified as outliers for  $F_{ST}$  and transcriptional regulation over the circadian cycle between surface fish and three different cavefish populations.**  
 $F_{ST}$  and logFC values for all genes which were found to be outliers for both  $F_{ST}$  and logFC in at least one cave-Río Choy comparison

315 **Acknowledgements**

316 This work was supported by an NIH NIGMS R35GM138098 to HB, NIH R01  
317 1R01GM127872 to ACK, and SEM, NIH R21 NS122166 to ACK, and the Texas A&M  
318 University College of Science Undergraduate Research Opportunities Program to ARP  
319



## 320 Reference

- 321
- 322 1. Harris, T.W., Arnaboldi, V., Cain, S., Chan, J., Chen, W.J., Cho, J., Davis, P., Gao,  
323 S., Grove, C.A., Kishore, R. *et al.* (2020) WormBase: a modern Model Organism  
324 Information Resource. *Nucleic Acids Res*, **48**, D762-D767.
  - 325 2. Howe, D.G., Ramachandran, S., Bradford, Y.M., Fashena, D., Toro, S., Eagle, A.,  
326 Frazer, K., Kalita, P., Mani, P., Martin, R. *et al.* (2021) The Zebrafish Information  
327 Network: major gene page and home page updates. *Nucleic Acids Res*, **49**,  
328 D1058-D1064.
  - 329 3. Larkin, A., Marygold, S.J., Antonazzo, G., Attrill, H., Dos Santos, G., Garapati,  
330 P.V., Goodman, J.L., Gramates, L.S., Millburn, G., Strelets, V.B. *et al.* (2021)  
331 FlyBase: updates to the *Drosophila melanogaster* knowledge base. *Nucleic Acids*  
332 *Res*, **49**, D899-D907.
  - 333 4. Juntti, S. (2019) The future of gene-guided neuroscience research in non-  
334 traditional model organisms. *Brain, behavior and evolution*, **93**, 108-121.
  - 335 5. McGaugh, S.E., Kowalko, J.E., Duboué, E., Lewis, P., Franz-Odenaal, T.A.,  
336 Rohner, N., Gross, J.B. and Keene, A.C. (2020). Wiley Online Library.
  - 337 6. Gross, J.B. (2012) The complex origin of *Astyanax* cavefish. *BMC evolutionary*  
338 *biology*, **12**, 1-12.
  - 339 7. Jeffery, W.R. (2020) *Astyanax* surface and cave fish morphs. *EvoDevo*, **11**, 1-10.
  - 340 8. Klaassen, H., Wang, Y., Adamski, K., Rohner, N. and Kowalko, J.E. (2018)  
341 CRISPR mutagenesis confirms the role of *oca2* in melanin pigmentation in  
342 *Astyanax mexicanus*. *Developmental Biology*, **441**, 313-318.
  - 343 9. Warren, W.C., Boggs, T.E., Borowsky, R., Carlson, B.M., Ferrufino, E., Gross, J.B.,  
344 Hillier, L., Hu, Z., Keene, A.C. and Kenzior, A. (2021) A chromosome-level genome  
345 of *Astyanax mexicanus* surface fish for comparing population-specific genetic  
346 differences contributing to trait evolution. *Nature communications*, **12**, 1-12.
  - 347 10. Herman, A., Brandvain, Y., Weagley, J., Jeffery, W.R., Keene, A.C., Kono, T.J.,  
348 Bilandžija, H., Borowsky, R., Espinasa, L. and O'Quin, K. (2018) The role of gene  
349 flow in rapid and repeated evolution of cave-related traits in Mexican tetra,  
350 *Astyanax mexicanus*. *Molecular ecology*, **27**, 4397-4416.
  - 351 11. Chang, W., Cheng, J., Allaire, J., Sievert, C., Schloerke, B., Xie, Y., Allen, J.,  
352 McPherson, J., Dipert, A. and Borges, B. (2021) shiny: Web Application  
353 Framework for R. R package version 1.6.0.
  - 354 12. Blackmon, H. and Demuth, J.P. (2015) Coleoptera karyotype database. *Coleopt.*  
355 *Bull*, **69**, 174-175.
  - 356 13. McGaugh, S.E., Gross, J.B., Aken, B., Blin, M., Borowsky, R., Chalopin, D.,  
357 Hinaux, H., Jeffery, W.R., Keene, A. and Ma, L. (2014) The cavefish genome  
358 reveals candidate genes for eye loss. *Nature communications*, **5**, 1-10.
  - 359 14. Mack, K.L., Jaggard, J.B., Persons, J.L., Roback, E.Y., Passow, C.N., Stanhope,  
360 B.A., Ferrufino, E., Tsuchiya, D., Smith, S.E. and Slaughter, B.D. (2021) Repeated  
361 evolution of circadian clock dysregulation in cavefish populations. *PLoS genetics*,  
362 **17**, e1009642.
  - 363 15. Moran, R.L., Jaggard, J.B., Roback, E.Y., Rohner, N., Kowalko, J.E., Ornelas-  
364 Garcia, P., McGaugh, S.E. and Keene, A.C. (2021) Hybridization underlies  
365 localized trait evolution in cavefish. *bioRxiv*.

- 366 16. The UniProt Consortium. (2020) UniProt: the universal protein knowledgebase in  
367 2021. *Nucleic Acids Research*, **49**, D480-D489.
- 368 17. The Gene Ontology Consortium. (2021) The Gene Ontology resource: enriching a  
369 GOLD mine. *Nucleic Acids Research*, **49**, D325-D334.
- 370 18. Ashburner, M., Ball, C.A., Blake, J.A., Botstein, D., Butler, H., Cherry, J.M., Davis,  
371 A.P., Dolinski, K., Dwight, S.S. and Eppig, J.T. (2000) Gene ontology: tool for the  
372 unification of biology. *Nature genetics*, **25**, 25-29.
- 373 19. Howe, K.L., Achuthan, P., Allen, J., Allen, J., Alvarez-Jarreta, J., Amode, M.R.,  
374 Armean, I.M., Azov, A.G., Bennett, R., Bhai, J. *et al.* (2021) Ensembl 2021. *Nucleic*  
375 *Acids Research*, **49**, D884-D891.
- 376 20. McGaugh, S.E., Passow, C.N., Jaggard, J.B., Stahl, B.A. and Keene, A.C. (2020)  
377 Unique transcriptional signatures of sleep loss across independently evolved  
378 cavefish populations. *Journal of Experimental Zoology Part B: Molecular and*  
379 *Developmental Evolution*, **334**, 497-510.
- 380 21. Charlesworth, B. (1998) Measures of divergence between populations and the  
381 effect of forces that reduce variability. *Molecular biology and evolution*, **15**, 538-  
382 543.
- 383 22. Teyke, T. and Schaerer, S. (1994) BLIND MEXICAN CAVE FISH (ASTYANAX  
384 HUBBSI) RESPOND TO MOVING VISUAL STIMULI. *J Exp Biol*, **188**, 89-101.
- 385 23. Moran, D., Softley, R. and Warrant, E.J. (2014) Eyeless Mexican cavefish save  
386 energy by eliminating the circadian rhythm in metabolism. *PLoS One*, **9**, e107877.
- 387 24. Beale, A., Guibal, C., Tamai, T.K., Klotz, L., Cowen, S., Peyric, E., Reynoso, V.H.,  
388 Yamamoto, Y. and Whitmore, D. (2013) Circadian rhythms in Mexican blind  
389 cavefish *Astyanax mexicanus* in the lab and in the field. *Nat Commun*, **4**, 2769.
- 390 25. Ceinos, R.M., Frigato, E., Pagano, C., Fröhlich, N., Negrini, P., Cavallari, N.,  
391 Vallone, D., Fuselli, S., Bertolucci, C. and Foulkes, N.S. (2018) Mutations in blind  
392 cavefish target the light-regulated circadian clock gene, period 2. *Sci Rep*, **8**, 8754.
- 393 26. Hoyle, N.P., Seinkmane, E., Putker, M., Feeney, K.A., Krogager, T.P., Chesham,  
394 J.E., Bray, L.K., Thomas, J.M., Dunn, K., Blaikley, J. *et al.* (2017) Circadian actin  
395 dynamics drive rhythmic fibroblast mobilization during wound healing. *Sci Transl*  
396 *Med*, **9**.
- 397 27. Kitchen, G.B., Cunningham, P.S., Poolman, T.M., Iqbal, M., Maidstone, R., Baxter,  
398 M., Bagnall, J., Begley, N., Saer, B., Hussell, T. *et al.* (2020) The clock gene *Bmal1*  
399 inhibits macrophage motility, phagocytosis, and impairs defense against  
400 pneumonia. *Proc Natl Acad Sci U S A*, **117**, 1543-1551.
- 401 28. Petsakou, A., Sapsis, T.P. and Blau, J. (2015) Circadian Rhythms in Rho1 Activity  
402 Regulate Neuronal Plasticity and Network Hierarchy. *Cell*, **162**, 823-835.
- 403 29. Manchanda, N., Portwood, J.L., Woodhouse, M.R., Seetharam, A.S., Lawrence-  
404 Dill, C.J., Andorf, C.M. and Hufford, M.B. (2020) GenomeQC: a quality assessment  
405 tool for genome assemblies and gene structure annotations. *BMC genomics*, **21**,  
406 1-9.
- 407 30. Consortium, T.o.S. (2014) Tree of Sex: A database of sexual systems. *Scientific*  
408 *Data*, **1**.
- 409 31. Oliver, S.G., Lock, A., Harris, M.A., Nurse, P. and Wood, V. (2016) Model organism  
410 databases: essential resources that need the support of both funders and users.  
411 *BMC biology*, **14**, 1-6.

- 412 32. Bellen, H.J., Hubbard, E., Lehmann, R., Madhani, H.D., Solnica-Krezel, L. and  
413 Southard-Smith, E.M. (2021) Model organism databases are in jeopardy.  
414 *Development*, **148**, dev200193.
- 415 33. Casane, D. and Rétaux, S. (2016) Evolutionary Genetics of the Cavefish *Astyanax*  
416 *mexicanus*. *Adv Genet*, **95**, 117-159.
- 417 34. Elipot, Y., Legendre, L., Père, S., Sohm, F. and Rétaux, S. (2014) *Astyanax*  
418 transgenesis and husbandry: how cavefish enters the laboratory. *Zebrafish*, **11**,  
419 291-299.
- 420 35. Jaggard, J.B., Stahl, B.A., Lloyd, E., Prober, D.A., Duboue, E.R. and Keene, A.C.  
421 (2018) Hypocretin underlies the evolution of sleep loss in the Mexican cavefish.  
422 *Elife*, **7**.
- 423 36. Stahl, B.A., Jaggard, J.B., Chin, J.S.R., Kowalko, J.E., Keene, A.C. and Duboué,  
424 E.R. (2019) Manipulation of Gene Function in Mexican Cavefish. *J Vis Exp*.
- 425 37. Stahl, B.A., Peuß, R., McDole, B., Kenzior, A., Jaggard, J.B., Gaudenz, K.,  
426 Krishnan, J., McGaugh, S.E., Duboue, E.R., Keene, A.C. *et al.* (2019) Stable  
427 transgenesis in *Astyanax mexicanus* using the Tol2 transposase system. *Dev Dyn*,  
428 **248**, 679-687.  
429
